# Supplementary material
Source: PubMed Central journal article supplement (PMC2669298)
Supplement: NIHMS72411-supplement-Table.pdf [file NIHMS72411-supplement-Table.pdf]

**Supplementary Table 1** Inhibitory NK receptors

| Gene                               | Other Names         | Species      | Structure            | Chromosome               | Signaling       | Ligand                                                                  |
|------------------------------------|---------------------|--------------|----------------------|--------------------------|-----------------|-------------------------------------------------------------------------|
| <i>Klra1</i>                       | Ly49a               | Mouse        | C-lectin homodimer   | 6                        | 1 ITIM          | H2-D <sup>d</sup> , -D <sup>k</sup>                                     |
| <i>Klra3</i>                       | Ly49c               | Mouse        | C-lectin homodimer   | 6                        | 1 ITIM          | H2-K <sup>b</sup> , -K <sup>d</sup> , -D <sup>d</sup> , -D <sup>k</sup> |
| <i>Klra5</i>                       | Ly49e               | Mouse        | C-lectin homodimer   | 6                        | 1 ITIM          | ?                                                                       |
| <i>Klra6</i>                       | Ly49f               | Mouse        | C-lectin homodimer   | 6                        | 1 ITIM          | H2 <sup>d</sup>                                                         |
| <i>Klra7</i>                       | Ly49g               | Mouse        | C-lectin homodimer   | 6                        | 1 ITIM          | H2-D <sup>d</sup>                                                       |
| <i>Klra9</i>                       | Ly49i               | Mouse        | C-lectin homodimer   | 6                        | 1 ITIM          | H2-D <sup>k</sup>                                                       |
| <i>Klrbl1a</i>                     | NKR-P1A             | Mouse        | C-lectin homodimer   | 6                        | 1 ITIM          | ?                                                                       |
| <i>Klrbl1b</i>                     | NKR-P1B             | Mouse        | C-lectin homodimer   | 6                        | 1 ITIM          | Ocil (Clrb)                                                             |
| <i>Lilrb4</i>                      | gp49b1              | Mouse        | Ig monomer           | 10                       | 2 ITIM          | $\alpha_v\beta_3$                                                       |
| <i>Pilra</i>                       | PILR $\alpha$       | Mouse        | Ig monomer           | 5                        | 1 ITIM          | CD99                                                                    |
| <i>CD244</i>                       | 2B4                 | Mouse, human | Ig monomer           | Mouse 1, Human 1q23.1    | 0 ITIM (4 ITSM) | CD48                                                                    |
| <i>KLRG1</i>                       | Mafa                | Mouse, human | C-lectin homodimer   | Mouse 6, Human 12p12-p13 | 1 ITIM          | E-cadherin, N-cadherin, R-cadherin                                      |
| <i>KLRD1-KLRC1</i>                 | CD94-NKG2A (CD159a) | Mouse, human | C-lectin heterodimer | Mouse 6, Human 12p13     | 1 ITIM          | Mouse Qa1 <sup>b</sup> , Human HLA-E                                    |
| <i>KLRB1</i>                       | NKR-P1A, CD161      | Human        | C-lectin homodimer   | 12p13                    | 1 ITIM          | LLT1 (OCIL, CLEC2D)                                                     |
| <i>LAIR1</i>                       | LAIR-1, CD305       | Mouse, human | Ig monomer           | Mouse 7, Human 19q13.4   | 2 ITIM          | Collagen                                                                |
| <i>LILRB1</i>                      | ILT2, LIR1, CD85j   | Human        | Ig monomer           | 19q13.4                  | 4 ITIM          | HLA class I                                                             |
| <i>KIR2DL3</i>                     | CD158b2             | Human        | Ig monomer           | 19q13.4                  | 2 ITIM          | HLA-C S77/N80                                                           |
| <i>KIR2DL2</i>                     | CD158b1             | Human        | Ig monomer           | 19q13.4                  | 2 ITIM          | HLA-C S77/N80                                                           |
| <i>KIR2DL1</i>                     | CD158b              | Human        | Ig monomer           | 19q13.4                  | 2 ITIM          | HLA-C N77/K80                                                           |
| <i>KIR3DL1</i>                     | CD158e1             | Human        | Ig monomer           | 19q13.4                  | 2 ITIM          | HLA-Bw4                                                                 |
| <i>KIR2DL5A</i><br><i>KIR2DL5b</i> | CD158f              | Human        | Ig monomer           | 19q13.4                  | 2 ITIM          | ?                                                                       |
| <i>KIR3DL2</i>                     | CD158k              | Human        | Ig homodimer         | 19q13.4                  | 2 ITIM          | HLA-A3, HLA-A11                                                         |
| <i>CEACAM1</i>                     | CD66a               | Human        | Ig monomer           | 19q13.2                  | 2 ITIM          | CD66                                                                    |
| <i>SIGLEC7</i>                     | CDw328, p75         | Human        | Ig monomer           | 19q13.3                  | 1 ITIM          | $\alpha$ -2,8 disialic acid                                             |

For polymorphic mouse genes, such as *Klra* and *Klrbl*, only alleles for C57BL/6 mice are included. Only NK cell receptors for which protein expression has been confirmed are included.

**Supplementary Table 2** Activating NK receptors

| Gene               | Other names         | Species      | Structure            | Chromosome              | Signaling                              | Ligand                                               |
|--------------------|---------------------|--------------|----------------------|-------------------------|----------------------------------------|------------------------------------------------------|
| <i>Klra4</i>       | Ly49D               | Mouse        | C-lectin homodimer   | 6                       | DAP12                                  | H2-D <sup>d</sup>                                    |
| <i>Klra8</i>       | Ly49H               | Mouse        | C-lectin homodimer   | 6                       | DAP12                                  | MCMV m157                                            |
| <i>Klra16</i>      | Ly49P               | Mouse        | C-lectin homodimer   | 6                       | DAP12                                  | MCMV?                                                |
| <i>Klrblc</i>      | NKR-P1C, NK1.1      | Mouse        | C-lectin homodimer   | 6                       | FcεRIγ                                 | ?                                                    |
| <i>Klrblf</i>      | NKR-P1F             | Mouse        | C-lectin homodimer   | 6                       | FcεRIγ ?                               | Clrg                                                 |
| <i>Pilrb1</i>      | PILRβ               | Mouse        | Ig monomer           | 5                       | DAP12                                  | CD99                                                 |
| <i>CD244</i>       | 2B4                 | Mouse, human | Ig monomer           | Mouse 1, Human 1q23.1   | ITSM, SAP                              | CD48                                                 |
| <i>KLRD1-KLRC2</i> | CD94-NKG2C (CD159e) | Mouse, human | C-lectin heterodimer | Mouse 6, Human 12p13    | DAP12                                  | Mouse Qa1 <sup>b</sup><br>Human HLA-E                |
| <i>KLRK1</i>       | NKG2D, CD314        | Mouse, human | C-lectin homodimer   | Mouse 6, Human 12p13    | Mouse DAP10 or DAP12, human DAP10 only | Mouse Rae-1, H60, MULT1<br>Human MICA, MICB, ULBP1-4 |
| <i>KLRF1</i>       | NKp80, CLEC5C       | Human        | C-lectin homodimer   | 12p13.2-p12.3           | ?                                      | AICL                                                 |
| <i>KIR2DS1</i>     | CD158h              | Human        | Ig monomer           | 19q13.4                 | DAP12                                  | HLA-C N77/K80                                        |
| <i>KIR2DS2</i>     | CD158j              | Human        | Ig monomer           | 19q13.4                 | DAP12                                  | ?                                                    |
| <i>KIR2DS4</i>     | CD158i              | Human        | Ig monomer           | 19q13.4                 | DAP12                                  | HLA-Cw4                                              |
| <i>KIR3DS1</i>     | CD158e2             | Human        | Ig monomer           | 19q13.4                 | DAP12                                  | ?                                                    |
| <i>KIR2DL4</i>     | CD158d              | Human        | Ig monomer           | 19q13.4                 | FcεRIγ                                 | HLA-G                                                |
| <i>NCR1</i>        | NKp46, CD335        | Human, mouse | Ig monomer           | Mouse 7, human 19q13.4  | FcεRIγ, CD3ζ                           | ?                                                    |
| <i>NCR2</i>        | NKp44, CD336        | Human        | Ig monomer           | Human 6p21.1            | DAP12                                  | ?                                                    |
| <i>NCR3</i>        | NKp30, 1C7, CD337   | Human        | Ig monomer           | Human 6p21.3            | FcεRIγ, CD3ζ                           | ?                                                    |
| <i>FCGR3</i>       | CD16                | Mouse, human | Ig monomer           | Mouse 1, human 1q23     | Mouse FcεRIγ, Human FcεRIγ or CD3ζ     | IgG                                                  |
| <i>CD226</i>       | DNAM-1, TLisa1      | Mouse, human | Ig monomer           | Mouse 18, human 18q22.3 | Protein kinase C                       | CD112, CD155                                         |
| <i>SLAMF7</i>      | CRACC, CD319        | Human        | Ig monomer           | Human 1q23.1-q24.1      | ITSM, EAT2                             | CRACC                                                |
| <i>SLAMF6</i>      | NTB-A               | Human        | Ig monomer           | Human 1q23.2            | ITSM,                                  | NTB-A                                                |

|  |  |  |  |  |           |  |
|--|--|--|--|--|-----------|--|
|  |  |  |  |  | SAP, EAT2 |  |
|--|--|--|--|--|-----------|--|

Only receptors for which protein expression on NK cells has been confirmed are included.
